# Supplementary material
Source: HighWire-hosted journal article supplement (https://www.rcpjournals.org/highwire/filestream/8497/field_highwire_adjunct_files/4/Shah_supp_file_5.pdf)
Supplement: Shah_supp_file_5.pdf [file Shah_supp_file_5.pdf]

| <b>PERIOD: APR-14 TO MAR-15</b>                         |                |
|---------------------------------------------------------|----------------|
| <b>COST SUMMARY:</b>                                    | <b>£</b>       |
| <b>STAFF SICKNESS ABSENCE</b>                           | <b>219,464</b> |
| <b>STAFF SICKNESS ABSENCE %<br/>Related to Violence</b> | <b>90,777</b>  |
| <b>ESTATES COSTS</b>                                    | <b>5,820</b>   |
| <b>RESPONSE TEAM COSTS</b>                              | <b>39,056</b>  |
| <b>LEGAL COSTS</b>                                      | <b>31,143</b>  |
| <b>BANK COSTS</b>                                       | <b>500,484</b> |
| <b>MEDICATION</b>                                       | <b>277,778</b> |
| <b>TOTAL INCIDENT COSTS</b>                             | <b>945,059</b> |
| <b>No: of Incidents</b>                                 | <b>278</b>     |
| <b>Cost Per Incident</b>                                | <b>3,399</b>   |
|                                                         |                |
|                                                         |                |
| <b>PERIOD: APR-15 TO MAR-16</b>                         |                |
| <b>COST SUMMARY:</b>                                    | <b>£</b>       |
| <b>STAFF SICKNESS ABSENCE</b>                           | <b>189,616</b> |
| <b>STAFF SICKNESS ABSENCE %<br/>Related to Violence</b> | <b>73,775</b>  |
| <b>ESTATES COSTS</b>                                    | <b>23,899</b>  |
| <b>RESPONSE TEAM COSTS</b>                              | <b>33,577</b>  |
| <b>LEGAL COSTS</b>                                      | <b>733</b>     |
| <b>BANK COSTS</b>                                       | <b>346,310</b> |
| <b>MEDICATION COSTS</b>                                 | <b>289,455</b> |
| <b>TOTAL INCIDENT COSTS</b>                             | <b>767,749</b> |
| <b>No: of Incidents</b>                                 | <b>239</b>     |
| <b>Cost Per Incident</b>                                | <b>3,212</b>   |
